# Supplementary material for: Agar Biopolymer Films for Biodegradable Packaging: A Reference Dataset for Exploring the Limits of Mechanical Performance
Source: MDPI journal article supplement (doi:10.3390/ma15113954), 2022-06-01
Supplement: s1 [file s1]

# Agar Biopolymer Films for Biodegradable Packaging: A reference dataset for exploring the limits of mechanical performance

Valentina Hernández<sup>1</sup>, Davor Ibarra<sup>2</sup>, Johan F. Triana<sup>3</sup>, Bastian Martínez-Soto<sup>4</sup>, Matías Faúndez<sup>2</sup>, Diego A. Vasco<sup>2</sup>, Leonardo Gordillo<sup>3</sup>, Felipe Herrera<sup>3,5</sup>, Claudio García-Herrera<sup>2</sup>, Alysia Garmulewicz<sup>1,6</sup>

<sup>1</sup> Department of Administration, Faculty of Administration and Economics, University of Santiago of Chile (USACH), Avenida Libertador Bernardo O'Higgins 3363, Estación Central, Santiago 917022, Chile

<sup>2</sup> Department of Mechanical Engineering, University of Santiago of Chile (USACH), Avenida Libertador Bernardo O'Higgins 3363, Santiago 917022, Chile

<sup>3</sup> Department of Physics, University of Santiago of Chile (USACH), Avenida Victor Jara 3493, Santiago 9170124, Chile

<sup>4</sup> Department of Mathematics and Computer Science, University of Santiago of Chile (USACH), Las Sophoras 173, Santiago 9170124, Chile

<sup>5</sup> ANID-Millennium Institute for Research in Optics, Concepción 4030000, Chile

<sup>6</sup> CABDyN Complexity Centre, University of Oxford, Oxford OX1 2JD, United Kingdom

\* Correspondence: alysia.garmulewicz@usach.cl

## 1. ANOVA - Data range 1: Low ingredients concentrations:

In Equation (1) the Young modulus model in low ingredients concentrations

$$\text{Young Modulus [Mpa]} = -9.463 + (20.78 \times \% \text{Agar}) + (13.09 \times \% \text{Gly}) - (28.45 \times \% \text{Agar} \times \% \text{Gly}) \quad (\text{S1})$$

**Table S1.** Statistic parameters for Young modulus model in low ingredients concentrations

| Term           | Effect  | Coef    | SE Coef | T-Value | P-Value | VIF  |
|----------------|---------|---------|---------|---------|---------|------|
| Constant       |         | 2.2548  | 0.0831  | 27.12   | 0.000   |      |
| % Agar         | -3.7223 | 1.8612  | 0.0831  | 22.39   | 0.000   | 1.00 |
| % Gly          | -2.5777 | -1.2888 | 0.0831  | -15.50  | 0.000   | 1.00 |
| % Agar × % Gly | -2.2223 | -1.1112 | 0.0831  | -13.36  | 0.000   | 1.00 |

**Table S2.** The correlation coefficient of the Young modulus model in low ingredients concentrations.

| S        | R-sq   | R-sq(adj) | R-sq(pred) |
|----------|--------|-----------|------------|
| 0.371826 | 98.29% | 97.97%    | 97.33%     |

**Table S3.** Analysis of variance of the Young modulus model in low ingredients concentrations.

| Source | DF | Adj SS  | Adj MS  | F-Value | P-Value |
|--------|----|---------|---------|---------|---------|
| Model  | 3  | 127.194 | 42.3981 | 306.67  | 0.000   |
| Linear | 2  | 102.501 | 51.2503 | 370.70  | 0.000   |
| % Agar | 1  | 69.279  | 69.2787 | 501.10  | 0.000   |
| % Gly  | 1  | 33.222  | 33.2219 | 240.30  | 0.000   |

|                    |    |         |         |        |       |
|--------------------|----|---------|---------|--------|-------|
| 2-Way Interactions | 1  | 24.694  | 24.6938 | 178.61 | 0.000 |
| % Agar × % Gly     | 1  | 24.694  | 24.6938 | 178.61 | 0.000 |
| Error              | 16 | 2.212   | 0.1383  |        |       |
| Total              | 19 | 129.406 |         |        |       |

**Table S4.** Fits and Diagnostics for Unusual Observations for Young modulus model in low ingredients concentrations.

| Obs | Young Modulus [Mpa] | Fit   | Resid  | Std Resid |
|-----|---------------------|-------|--------|-----------|
| 11  | 5.350               | 6.516 | -1.166 | -3.51     |
| 13  | 7.240               | 6.516 | 0.724  | 2.18      |

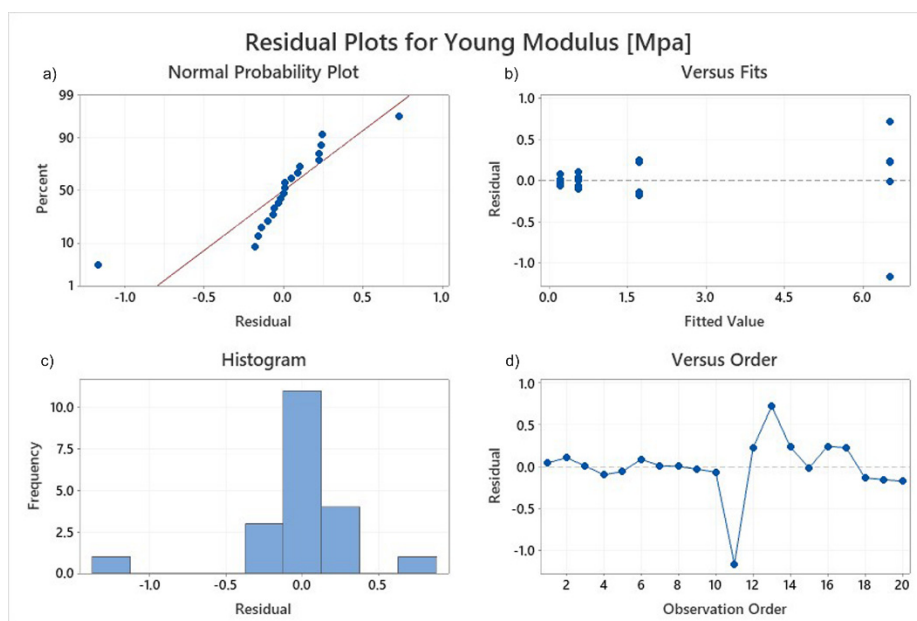

**Figure S1.** Analysis of residuals for Young modulus model in low ingredients concentrations. (a) Homoscedasticity analysis. (b) Residuals analysis. (c) Residuals distributions. (d) Randomized analysis.

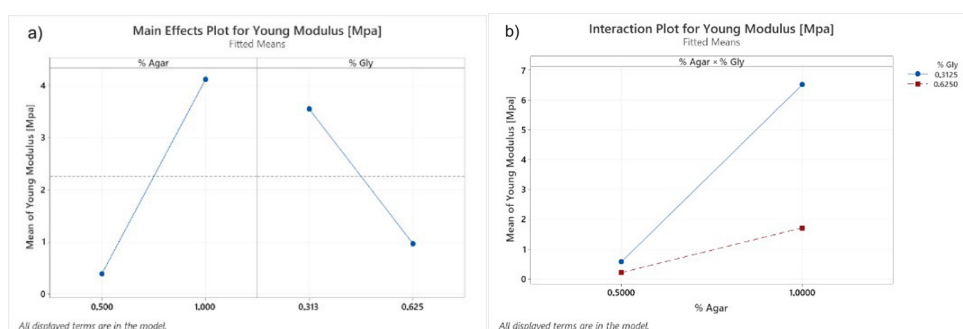

**Figure S2.** Effect analysis for Young modulus model in low ingredients concentrations. (a) Main effects. (b) Interaction effect.

In Equation (2) the elongation at break model in low ingredients concentrations

$$\text{Elongation at break [\%]} = 43.51 - (30.13 \times \% \text{Agar}) - (12.57 \times \% \text{Gly}) + (39.6 \times \% \text{Agar} \times \% \text{Gly}) \quad (\text{S2})$$

**Table S5.** Statistic parameters for elongation at break model in low ingredients concentrations

| Term                  | Effect | Coef   | SE Coef | T-Value | P-Value | VIF  |
|-----------------------|--------|--------|---------|---------|---------|------|
| Constant              |        | 28.948 | 0.443   | 65.41   | 0.000   |      |
| % Agar                | -5.778 | -2.889 | 0.443   | -6.53   | 0.000   | 1.00 |
| % Gly                 | 5.358  | 2.679  | 0.443   | 6.05    | 0.000   | 1.00 |
| % Agar $\times$ % Gly | 3.096  | 1.548  | 0.443   | 3.50    | 0.003   | 1.00 |

**Table S6.** The correlation coefficient of the elongation at break model in low ingredients concentrations.

| S       | R-sq   | R-sq(adj) | R-sq(pred) |
|---------|--------|-----------|------------|
| 1.97925 | 85.11% | 82.32%    | 76.74%     |

**Table S7.** Analysis of variance of the elongation at break model in low ingredients concentrations.

| Source                | DF | Adj SS | Adj MS  | F-Value | p-Value |
|-----------------------|----|--------|---------|---------|---------|
| Model                 | 3  | 358.34 | 119.447 | 30.49   | 0.000   |
| Linear                | 2  | 310.43 | 155.215 | 39.62   | 0.000   |
| % Agar                | 1  | 166.91 | 166.906 | 42.61   | 0.000   |
| % Gly                 | 1  | 143.52 | 143.524 | 36.64   | 0.000   |
| 2-Way Interactions    | 1  | 47.91  | 47.912  | 12.23   | 0.003   |
| % Agar $\times$ % Gly | 1  | 47.91  | 47.912  | 12.23   | 0.003   |
| Error                 | 16 | 62.68  | 3.917   |         |         |
| Total                 | 3  | 358.34 | 119.447 | 30.49   | 0.000   |

**Table S8.** Fits and Diagnostics for Unusual Observations for elongation at break model in low ingredients concentrations.

| Obs | Elongation at break [%] | Fit    | Resid  | Std Resid |
|-----|-------------------------|--------|--------|-----------|
| 6   | 28.950                  | 32.968 | -4.018 | -2.27     |
| 16  | 26.275                  | 30.286 | -4.011 | -2.27     |

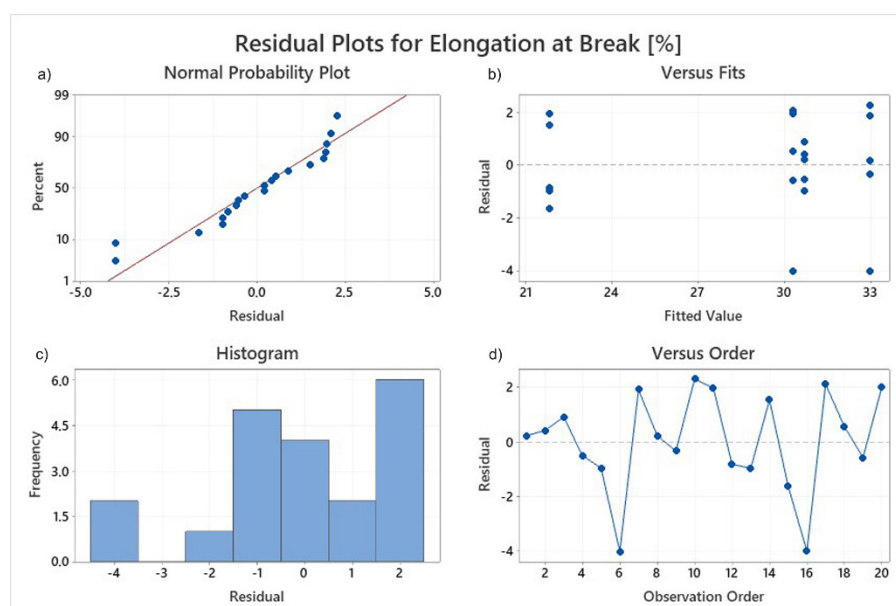**Figure S3.** Analysis of residuals for elongation at break model in low ingredients concentrations. (a) Homoscedasticity analysis. (b) Residuals analysis. (c) Residuals distributions. (d) Randomized analysis.

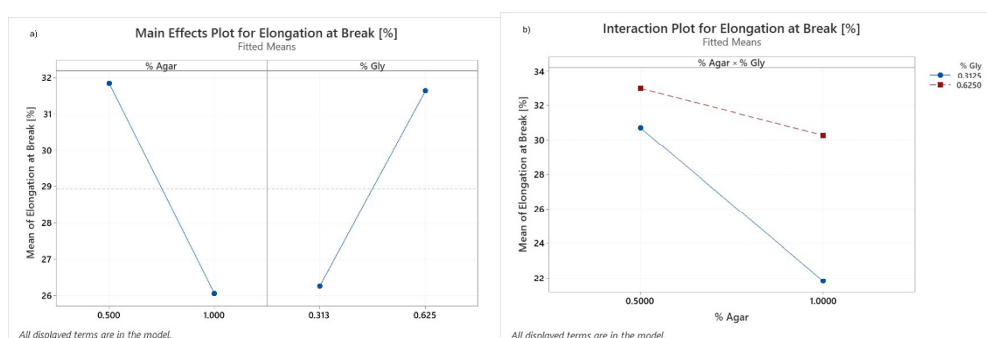

**Figure S4.** Effect analysis for elongation at break model in low ingredients concentrations. (a) Main effects. (b) Interaction effect.

In Equation (3) the Ultimate Tensile Strength (UTS) model in low ingredients concentrations

$$\text{UTS [Mpa]} = -21.44 + (57.04 \times \% \text{Agar}) + (25.06 \times \% \text{Gly}) - (65.38 \times \% \text{Agar} \times \% \text{Gly}) \quad (\text{S3})$$

**Table S9.** Statistic parameters for UTS model in low ingredients concentrations

| Term           | Effect | Coef   | SE Coef | T-Value | P-Value | VIF  |
|----------------|--------|--------|---------|---------|---------|------|
| Constant       |        | 10.103 | 0.216   | 46.72   | 0.000   |      |
| % Agar         | 13.198 | 6.599  | 0.216   | 30.52   | 0.000   | 1.00 |
| % Gly          | -7.491 | -3.746 | 0.216   | -17.32  | 0.000   | 1.00 |
| % Agar × % Gly | -5.108 | -2.554 | 0.216   | -11.81  | 0.000   | 1.00 |

**Table S10.** The correlation coefficient of the UTS model in low ingredients concentrations.

| S        | R-sq   | R-sq(adj) | R-sq(pred) |
|----------|--------|-----------|------------|
| 0.966992 | 98.85% | 98.63%    | 98.20%     |

**Table S11.** Analysis of variance of the UTS model in low ingredients concentrations.

| Source             | DF | Adj SS  | Adj MS  | F-Value | P-Value |
|--------------------|----|---------|---------|---------|---------|
| Model              | 3  | 1281.97 | 427.323 | 456.99  | 0.000   |
| Linear             | 2  | 1151.53 | 575.767 | 615.74  | 0.000   |
| % Agar             | 1  | 870.94  | 870.939 | 931.41  | 0.000   |
| % Gly              | 1  | 280.59  | 280.595 | 300.08  | 0.000   |
| 2-Way Interactions | 1  | 130.44  | 130.436 | 139.49  | 0.000   |
| % Agar × % Gly     | 1  | 130.44  | 130.436 | 139.49  | 0.000   |
| Error              | 16 | 14.96   | 0.935   |         |         |
| Total              | 19 | 1296.93 |         |         |         |

**Table S12.** Fits and Diagnostics for Unusual Observations for UTS model in low ingredients concentrations.

| Obs | UTS [Mpa] | Fit    | Resid | Std Resid |
|-----|-----------|--------|-------|-----------|
| 17  | 12.252    | 10.402 | 1.849 | 2.14      |

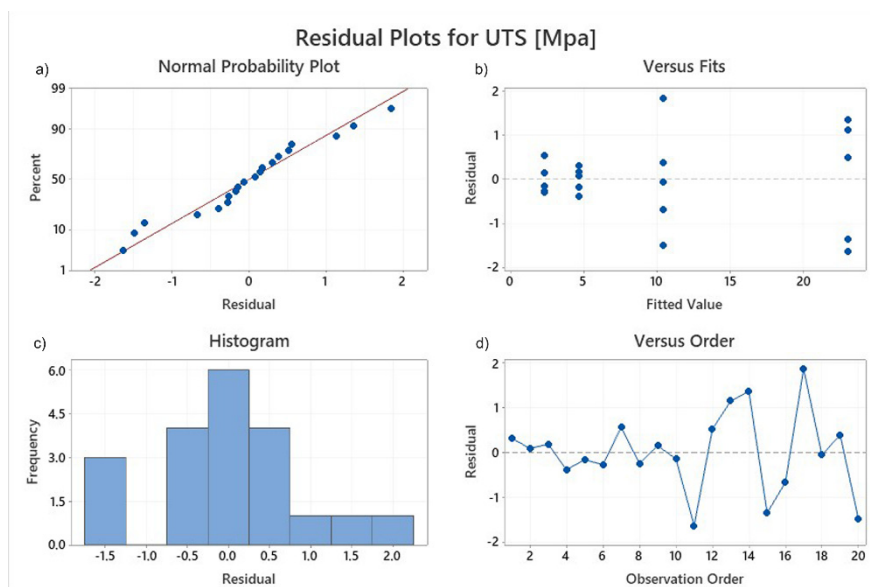

**Figure S5.** Analysis of residuals for UTS model in low ingredients concentrations. (a) Homoscedasticity analysis. (b) Residuals analysis. (c) Residuals distributions. (d) Randomized analysis.

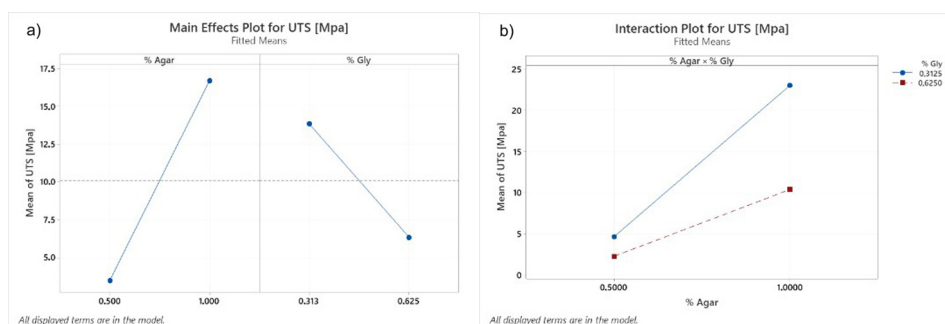

**Figure S6.** Effect analysis for UTS model in low ingredients concentrations. (a) Main effects. (b) Interaction effect.

## 2. ANOVA - Data range 2: Medium ingredients concentrations:

In Equation 4 the Young modulus model in medium ingredients concentrations

$$\text{Young Modulus [Mpa]} = 14.07 - (4.980 \times \% \text{Agar}) - (8.620 \times \% \text{Gly}) + (3.301 \times \% \text{Agar} \times \% \text{Gly}) \quad (\text{S4})$$

**Table S13.** Statistic parameters for Young modulus model in medium ingredients concentrations

| Term           | Effect  | Coef    | SE Coef | T-Value | P-Value | VIF  |
|----------------|---------|---------|---------|---------|---------|------|
| Constant       |         | 1.0483  | 0.0422  | 24.85   | 0.000   |      |
| % Agar         | 0.1788  | 0.0894  | 0.0422  | 2.12    | 0.050   | 1.00 |
| % Gly          | -0.2289 | -0.1145 | 0.0422  | -2.71   | 0.015   | 1.00 |
| % Agar × % Gly | 1.0317  | 0.5158  | 0.0422  | 12.23   | 0.000   | 1.00 |

**Table S14.** The correlation coefficient of the Young modulus model in medium ingredients concentrations.

| S        | R-sq   | R-sq(adj) | R-sq(pred) |
|----------|--------|-----------|------------|
| 0.188651 | 90.98% | 89.29%    | 85.91%     |

**Table S15.** Analysis of variance of the Young modulus model in medium ingredients concentrations.

| Source             | DF | Adj SS | Adj MS  | F-Value | P-Value |
|--------------------|----|--------|---------|---------|---------|
| Model              | 3  | 5.7437 | 1.91456 | 53.80   | 0.000   |
| Linear             | 2  | 0.4219 | 0.21097 | 5.93    | 0.012   |
| % Agar             | 1  | 0.1599 | 0.15990 | 4.49    | 0.050   |
| % Gly              | 1  | 0.2620 | 0.26204 | 7.36    | 0.015   |
| 2-Way Interactions | 1  | 5.3218 | 5.32175 | 149.53  | 0.000   |
| % Agar × % Gly     | 1  | 5.3218 | 5.32175 | 149.53  | 0.000   |
| Error              | 16 | 0.5694 | 0.03559 |         |         |
| Total              | 19 | 6.3131 |         |         |         |

**Table S16.** Fits and Diagnostics for Unusual Observations for Young modulus model in medium ingredients concentrations.

| Obs | Young Modulus [Mpa] | Fit    | Resid   | Std Resid |
|-----|---------------------|--------|---------|-----------|
| 12  | 0.3613              | 0.7364 | -0.3750 | -2.22     |
| 13  | 0.3633              | 0.7364 | -0.3730 | -2.21     |

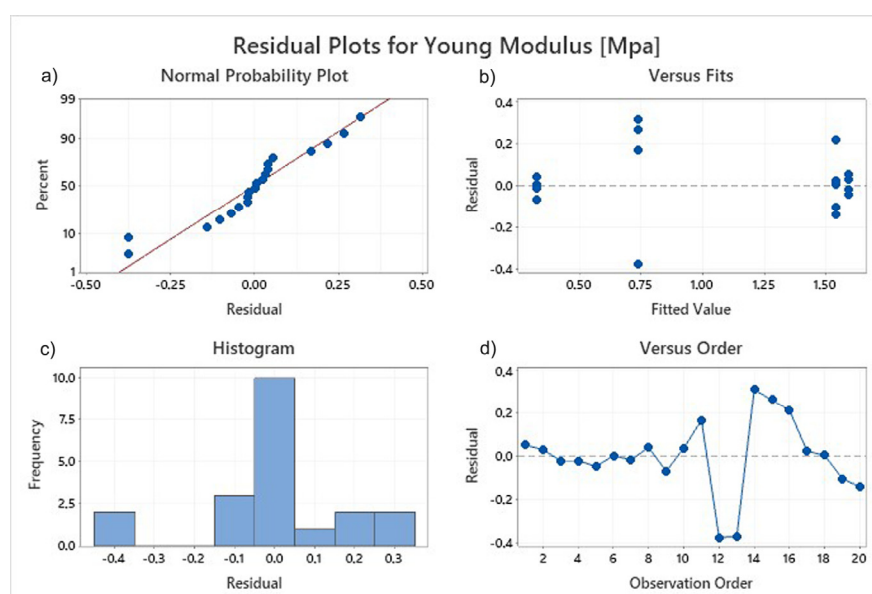**Figure S7.** Analysis of residuals for Young modulus model in medium ingredients concentrations. (a) Homoscedasticity analysis. (b) Residuals analysis. (c) Residuals distributions. (d) Randomized analysis.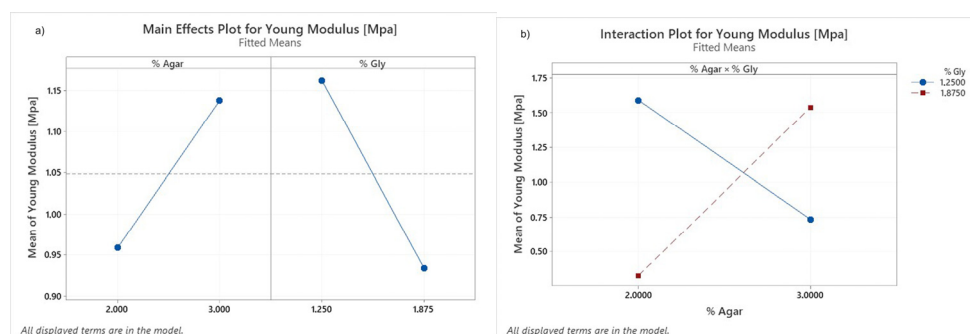**Figure S8.** Effect analysis for Young modulus model in medium ingredients concentrations. (a) Main effects. (b) Interaction effect.

In Equation 5 the elongation at break model in medium ingredients concentrations

$$\text{Elongation at break [\%]} = 35.6 - (0.29 \times \% \text{Agar}) + (7.33 \times \% \text{Gly}) - (1.12 \times \% \text{Agar} \times \% \text{Gly}) \quad (\text{S5})$$

**Table S17.** Statistic parameters for elongation at break model in medium ingredients concentrations

| Term           | Effect | Coef   | SE Coef | T-Value | P-Value | VIF  |
|----------------|--------|--------|---------|---------|---------|------|
| Constant       |        | 41.981 | 0.554   | 75.74   | 0.000   |      |
| % Agar         | -2.042 | -1.021 | 0.554   | -1.84   | 0.084   | 1.00 |
| % Gly          | 2.831  | 1.415  | 0.554   | 2.55    | 0.021   | 1.00 |
| % Agar × % Gly | -0.350 | -0.175 | 0.554   | -0.32   | 0.756   | 1.00 |

**Table S18.** The correlation coefficient of the elongation at break model in medium ingredients concentrations.

| S       | R-sq   | R-sq(adj) | R-sq(pred) |
|---------|--------|-----------|------------|
| 2.47884 | 38.50% | 26.96%    | 3.90%      |

**Table S19.** Analysis of variance of the elongation at break model in medium ingredients concentrations.

| Source             | DF | Adj SS  | Adj MS  | F-Value | P-Value |
|--------------------|----|---------|---------|---------|---------|
| Model              | 3  | 61.534  | 20.5112 | 3.34    | 0.046   |
| Linear             | 2  | 60.920  | 30.4602 | 4.96    | 0.021   |
| % Agar             | 1  | 20.848  | 20.8478 | 3.39    | 0.084   |
| % Gly              | 1  | 40.073  | 40.0725 | 6.52    | 0.021   |
| 2-Way Interactions | 1  | 0.613   | 0.6133  | 0.10    | 0.756   |
| % Agar × % Gly     | 1  | 0.613   | 0.6133  | 0.10    | 0.756   |
| Error              | 16 | 98.314  | 6.1446  |         |         |
| Total              | 19 | 159.848 |         |         |         |

**Table S20.** Fits and Diagnostics for Unusual Observations for elongation at break model in medium ingredients concentrations.

| Obs | Elongation at break [Mpa] | Fit   | Resid | Std Resid |
|-----|---------------------------|-------|-------|-----------|
| 11  | 44.95                     | 39.72 | 5.23  | 2.36      |
| 15  | 34.74                     | 39.72 | -4.98 | -2.25     |

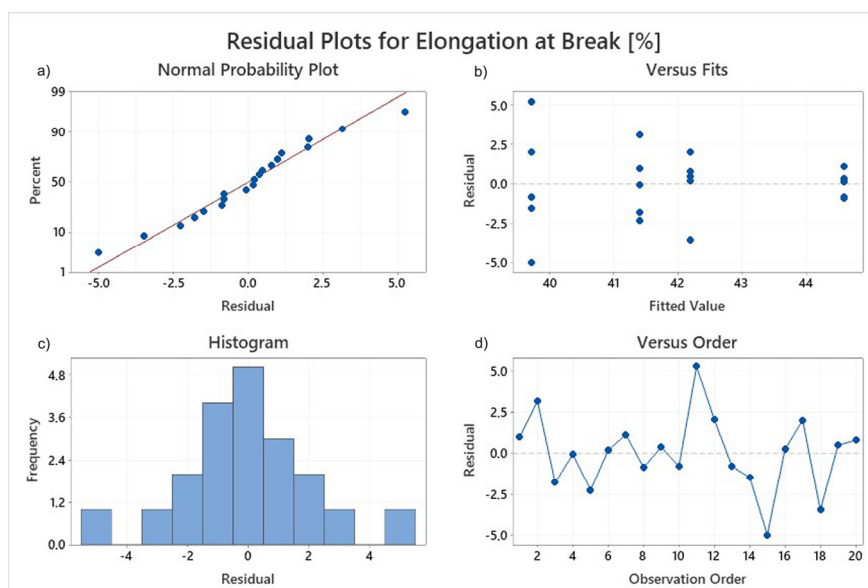

**Figure S9.** Analysis of residuals for elongation at break model in medium ingredients concentrations. (a) Homoscedasticity analysis. (b) Residuals analysis. (c) Residuals distributions. (d) Randomized analysis.

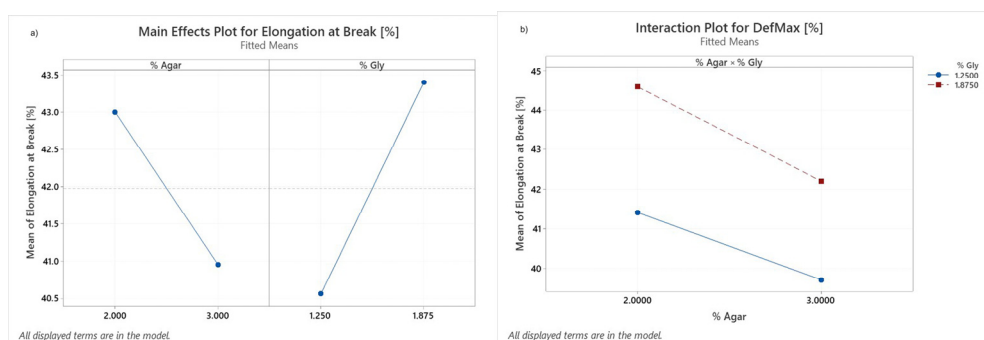

**Figure S10.** Effect analysis for elongation at break model in medium ingredients concentrations. (a) Main effects. (b) Interaction effect.

In Equation (6) the Ultimate Tensile Strength (UTS) model in medium ingredients concentrations

$$\text{UTS [Mpa]} = 75.98 - (26.10 \times \% \text{Agar}) - (45.78 \times \% \text{Gly}) + (17.735 \times \% \text{Agar} \times \% \text{Gly}) \quad (\text{S6})$$

**Table S21.** Statistic parameters for UTS model in medium ingredients concentrations

| Term           | Effect | Coef   | SE Coef | T-Value | P-Value | VIF  |
|----------------|--------|--------|---------|---------|---------|------|
| Constant       |        | 8.476  | 0.123   | 69.05   | 0.000   |      |
| % Agar         | 1.612  | 0.806  | 0.123   | 6.57    | 0.000   | 1.00 |
| % Gly          | -0.901 | -0.451 | 0.123   | -3.67   | 0.002   | 1.00 |
| % Agar × % Gly | 5.542  | 2.771  | 0.123   | 22.58   | 0.000   | 1.00 |

**Table S22.** The correlation coefficient of the UTS model in medium ingredients concentrations.

| S        | R-sq   | R-sq(adj) | R-sq(pred) |
|----------|--------|-----------|------------|
| 0.548936 | 97.25% | 96.74%    | 95.71%     |



**Table S23.** Analysis of variance of the UTS model in medium ingredients concentrations.

| Source             | DF | Adj SS  | Adj MS  | F-Value | P-Value |
|--------------------|----|---------|---------|---------|---------|
| Model              | 3  | 170.636 | 56.879  | 188.76  | 0.000   |
| Linear             | 2  | 17.050  | 8.525   | 28.29   | 0.000   |
| % Agar             | 1  | 12.987  | 12.987  | 43.10   | 0.000   |
| % Gly              | 1  | 4.063   | 4.063   | 13.48   | 0.002   |
| 2-Way Interactions | 1  | 153.585 | 153.585 | 509.69  | 0.000   |
| % Agar × % Gly     | 1  | 153.585 | 153.585 | 509.69  | 0.000   |
| Error              | 16 | 4.821   | 0.301   |         |         |
| Total              | 19 | 175.457 |         |         |         |

**Table S24.** Fits and Diagnostics for Unusual Observations for UTS model in medium ingredients concentrations.

| Obs | UTS [Mpa] | Fit    | Resid  | Std Resid |
|-----|-----------|--------|--------|-----------|
| 5   | 9.824     | 10.892 | -1.068 | -2.17     |
| 12  | 5.851     | 6.961  | -1.110 | -2.26     |

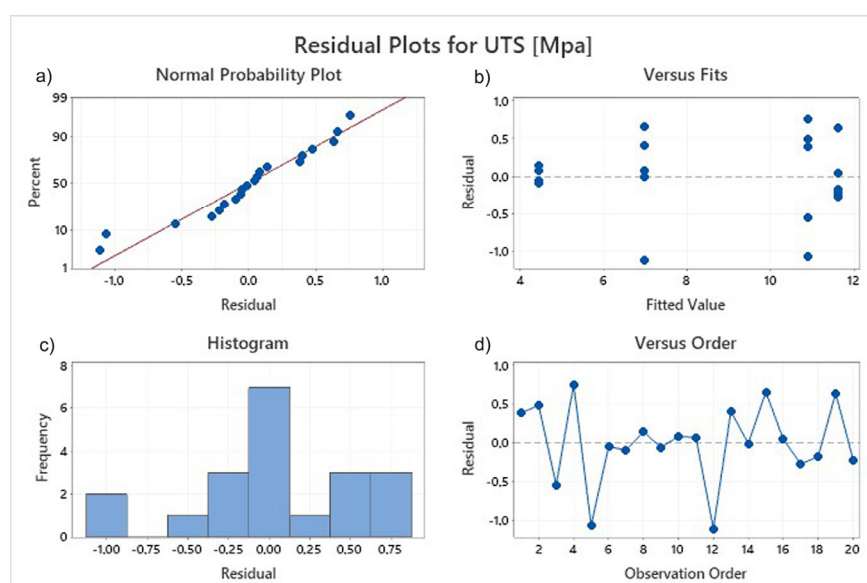**Figure S11.** Analysis of residuals for UTS model in medium ingredients concentrations. (a) Homoscedasticity analysis. (b) Residuals analysis. (c) Residuals distributions. (d) Randomized analysis.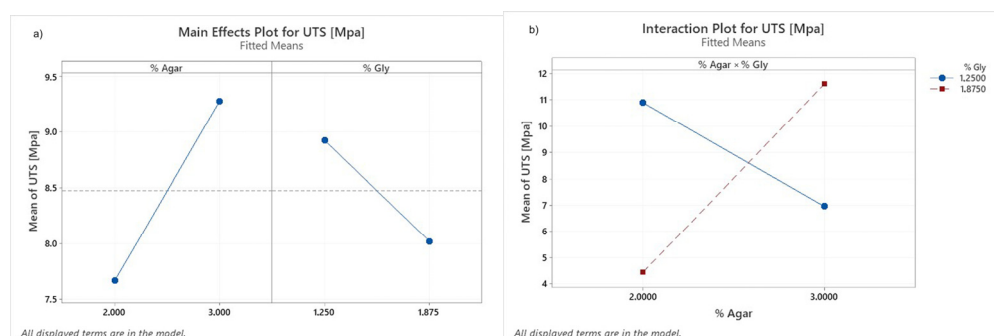**Figure S12.** Effect analysis for UTS model in medium ingredients concentrations. (a) Main effects. (b) Interaction effect.

### 3. ANOVA - Data range 3: High ingredients concentrations:

In Equation 7 the Young modulus model in high ingredients concentrations

$$\text{Young Modulus [Mpa]} = 1.457 - (0.2275 \times \% \text{Agar}) - (0.1981 \times \% \text{Gly}) + (0.0387 \times \% \text{Agar} \times \% \text{Gly}) \quad (\text{S7})$$

**Table S25.** Statistic parameters for Young modulus model in high ingredients concentrations

| Term           | Effect | Coef   | SE Coef | T-Value | P-Value | VIF  |
|----------------|--------|--------|---------|---------|---------|------|
| Constant       |        | 0.3641 | 0.0660  | 5.51    | 0.000   |      |
| % Agar         | 0.3314 | 0.1657 | 0.0660  | 2.51    | 0.026   | 1.13 |
| % Gly          | 0.1816 | 0.0908 | 0.0660  | 1.37    | 0.193   | 1.13 |
| % Agar × % Gly | 0.4139 | 0.2069 | 0.0660  | 3.13    | 0.008   | 1.13 |

**Table S26.** The correlation coefficient of the Young modulus model in high ingredients concentrations.

| S        | R-sq   | R-sq(adj) | R-sq(pred) |
|----------|--------|-----------|------------|
| 0.251904 | 61.00% | 52.00%    | 38.94%     |

**Table S27.** Analysis of variance of the Young modulus model in high ingredients concentrations.

| Source             | DF | Adj SS | Adj MS  | F-Value | P-Value |
|--------------------|----|--------|---------|---------|---------|
| Model              | 3  | 1.2900 | 0.43001 | 6.78    | 0.005   |
| Linear             | 2  | 0.6900 | 0.34499 | 5.44    | 0.019   |
| % Agar             | 1  | 0.3995 | 0.39945 | 6.29    | 0.026   |
| % Gly              | 1  | 0.1199 | 0.11986 | 1.89    | 0.193   |
| 2-Way Interactions | 1  | 0.6228 | 0.62283 | 9.82    | 0.008   |
| % Agar × % Gly     | 1  | 0.6228 | 0.62283 | 9.82    | 0.008   |
| Error              | 13 | 0.8249 | 0.06346 |         |         |
| Total              | 16 | 2.1150 |         |         |         |

**Table S28.** Fits and Diagnostics for Unusual Observations for Young modulus model in high ingredients concentrations.

| Obs | Young Modulus [Mpa] | Fit   | Resid | Std Resid |
|-----|---------------------|-------|-------|-----------|
| 1   | 0.997               | 0.315 | 0.683 | 3.03      |

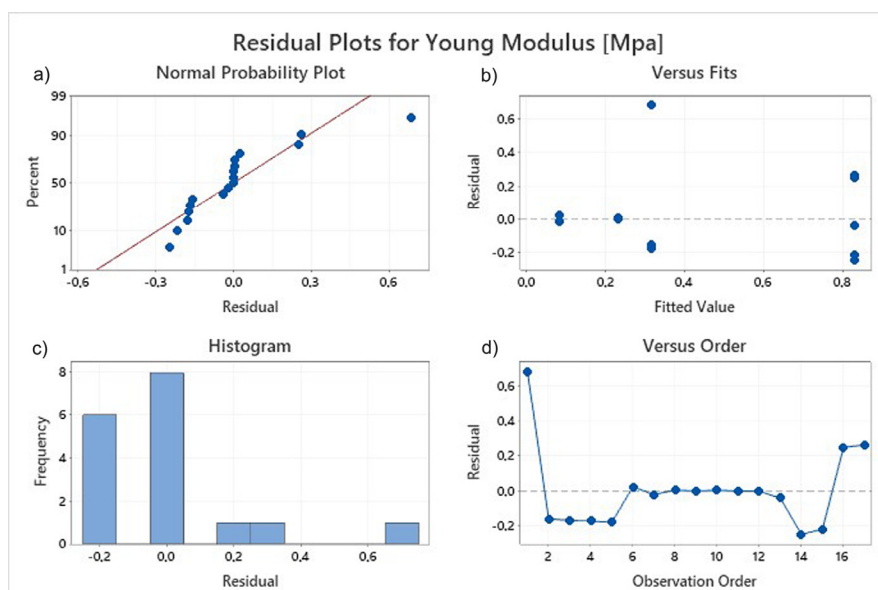

**Figure S13.** Analysis of residuals for Young modulus model in high ingredients concentrations. (a) Homoscedasticity analysis. (b) Residuals analysis. (c) Residuals distributions. (d) Randomized analysis.

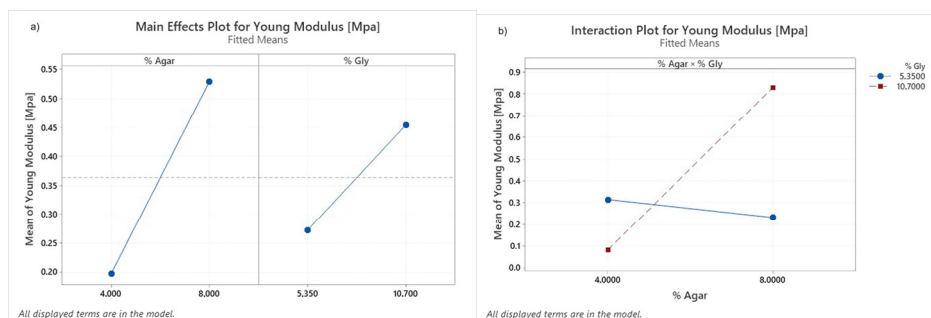

**Figure S14.** Effect analysis for Young modulus model in high ingredients concentrations. (a) Main effects. (b) Interaction effect.

In Equation 8 the elongation at break model in high ingredients concentrations

$$\text{Elongation at break [\%]} = -70.0 + (12.59 \times \% \text{Agar}) + (23.11 \times \% \text{Gly}) - (2.612 \times \% \text{Agar} \times \% \text{Gly}) \quad (\text{S8})$$

**Table S29.** Statistic parameters for elongation at break model in high ingredients concentrations

| Term           | Effect | Coef   | SE Coef | T-Value | P-Value | VIF  |
|----------------|--------|--------|---------|---------|---------|------|
| Constant       |        | 65.18  | 1.72    | 38.00   | 0.000   |      |
| % Agar         | -33.49 | -16.75 | 1.72    | -9.76   | 0.000   | 1.13 |
| % Gly          | 39.80  | 19.90  | 1.72    | 11.60   | 0.000   | 1.13 |
| % Agar × % Gly | -27.95 | -13.97 | 1.72    | -8.15   | 0.000   | 1.13 |

**Table S30.** The correlation coefficient of the elongation at break model in high ingredients concentrations.

| S       | R-sq   | R-sq(adj) | R-sq(pred) |
|---------|--------|-----------|------------|
| 6.54284 | 93.78% | 92.34%    | 85.85%     |

**Table S31.** Analysis of variance of the elongation at break model in high ingredients concentrations.

| Source             | DF | Adj SS | Adj MS  | F-Value | P-Value |
|--------------------|----|--------|---------|---------|---------|
| Model              | 3  | 8390.0 | 2796.67 | 65.33   | 0.000   |
| Linear             | 2  | 7773.0 | 3886.48 | 90.79   | 0.000   |
| % Agar             | 1  | 4079.2 | 4079.21 | 95.29   | 0.000   |
| % Gly              | 1  | 5759.4 | 5759.44 | 134.54  | 0.000   |
| 2-Way Interactions | 1  | 2840.1 | 2840.06 | 66.34   | 0.000   |
| % Agar × % Gly     | 1  | 2840.1 | 2840.06 | 66.34   | 0.000   |
| Error              | 13 | 556.5  | 42.81   |         |         |
| Total              | 16 | 8946.5 |         |         |         |

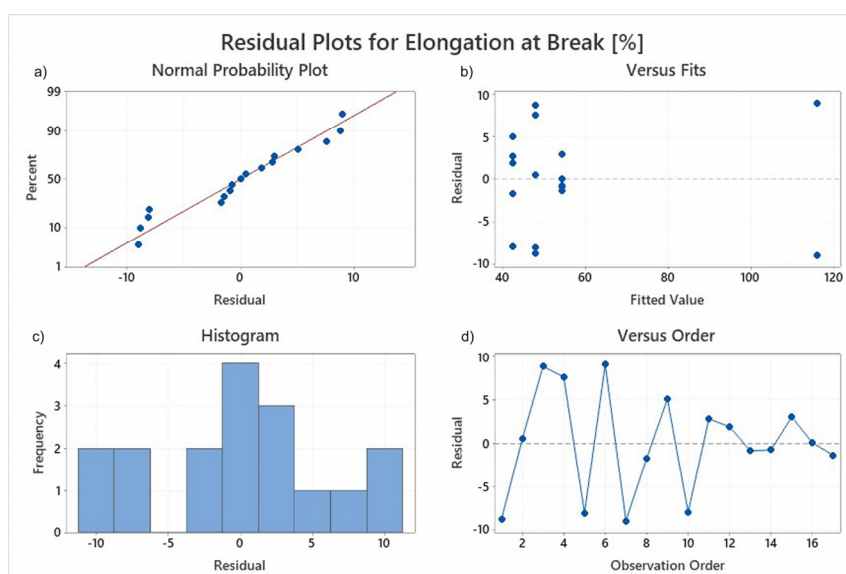**Figure S15.** Analysis of residuals for elongation at break model in high ingredients concentrations. (a) Homoscedasticity analysis. (b) Residuals analysis. (c) Residuals distributions. (d) Randomized analysis.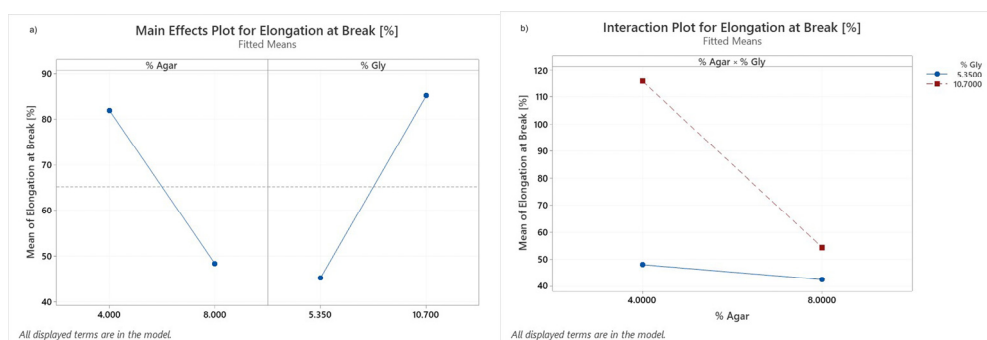**Figure S16.** Effect analysis for elongation at break model in high ingredients concentrations. (a) Main effects. (b) Interaction effect.

In Equation 9 the Ultimate Tensile Strenght (UTS) model in high ingredients concentrations

$$\text{UTS [Mpa]} = 9.18 - (1.240 \times \% \text{Agar}) - (1.261 \times \% \text{Gly}) + (0.2801 \times \% \text{Agar} \times \% \text{Gly}) \quad (\text{S9})$$

**Table S32.** Statistic parameters for UTS model in high ingredients concentrations

| Term                  | Effect | Coef  | SE Coef | T-Value | P-Value | VIF  |
|-----------------------|--------|-------|---------|---------|---------|------|
| Constant              |        | 5.104 | 0.160   | 31.99   | 0.000   |      |
| % Agar                | 4.031  | 2.015 | 0.160   | 12.63   | 0.000   | 1.13 |
| % Gly                 | 2.245  | 1.123 | 0.160   | 7.04    | 0.000   | 1.13 |
| % Agar $\times$ % Gly | 2.997  | 1.499 | 0.160   | 9.39    | 0.000   | 1.13 |

**Table S33.** The correlation coefficient of the UTS model in high ingredients concentrations.

| S        | R-sq   | R-sq(adj) | R-sq(pred) |
|----------|--------|-----------|------------|
| 0.608422 | 96.46% | 95.64%    | 94.10%     |

**Table S34.** Analysis of variance of the UTS model in high ingredients concentrations.

| Source                | DF | Adj SS  | Adj MS  | F-Value | P-Value |
|-----------------------|----|---------|---------|---------|---------|
| Model                 | 3  | 131.185 | 43.7285 | 118.13  | 0.000   |
| Linear                | 2  | 103.034 | 51.5171 | 139.17  | 0.000   |
| % Agar                | 1  | 59.083  | 59.0829 | 159.61  | 0.000   |
| % Gly                 | 1  | 18.335  | 18.3350 | 49.53   | 0.000   |
| 2-Way Interactions    | 1  | 32.668  | 32.6683 | 88.25   | 0.000   |
| % Agar $\times$ % Gly | 1  | 32.668  | 32.6683 | 88.25   | 0.000   |
| Error                 | 13 | 4.812   | 0.3702  |         |         |
| Total                 | 16 | 135.998 |         |         |         |

**Table S35.** Fits and Diagnostics for Unusual Observations for UTS model in high ingredients concentrations.

| Obs | UTS [Mpa] | Fit   | Resid | Std Resid |
|-----|-----------|-------|-------|-----------|
| 3   | 4.562     | 3.465 | 1.097 | 2.02      |

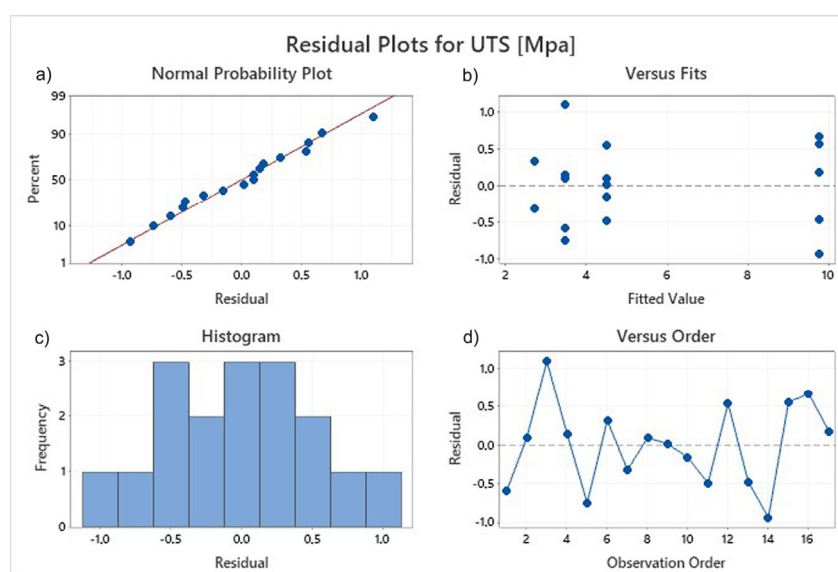**Figure S17.** Analysis of residuals for UTS model in high ingredients concentrations. (a) Homoscedasticity analysis. (b) Residuals analysis. (c) Residuals distributions. (d) Randomized analysis.

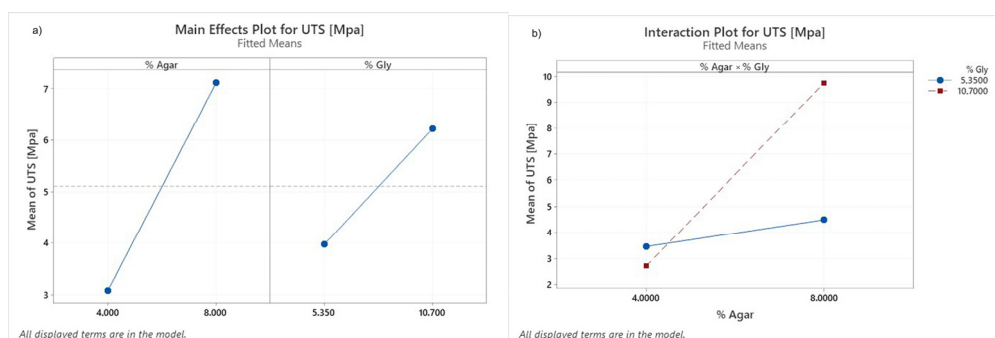

**Figure S18.** Effect analysis for UTS model in high ingredients concentrations. (a) Main effects. (b) Interaction effect.
